# Supplementary material for: Cytospin-A Regulates Colorectal Cancer Cell Division and Migration by Modulating Stability of Microtubules and Actin Filaments
Source: MDPI journal article supplement (doi:10.3390/cancers14081977), 2022-04-14
Supplement: s1 [file s1]

Original blots for Figure 1

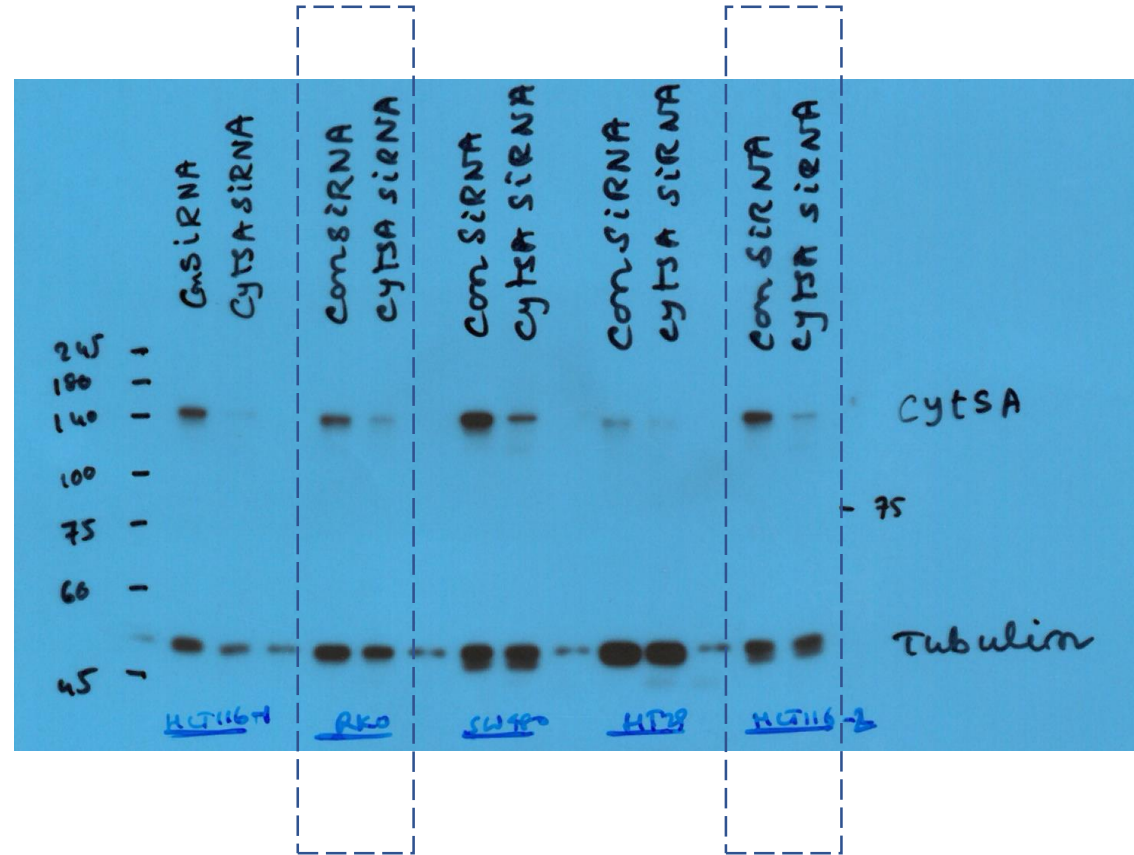

# Original blots for Figure 5 and Supplementary Figure S4

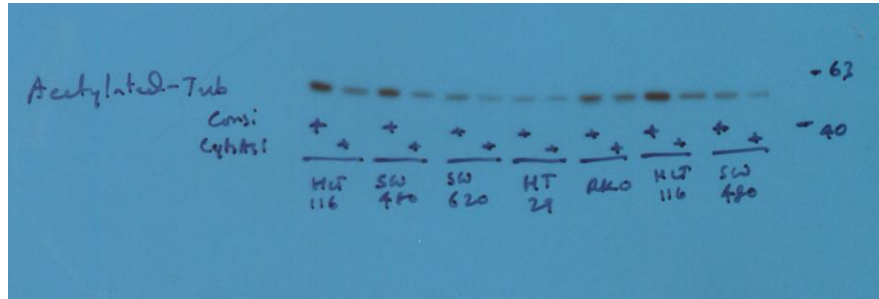

Acetylated tubulin

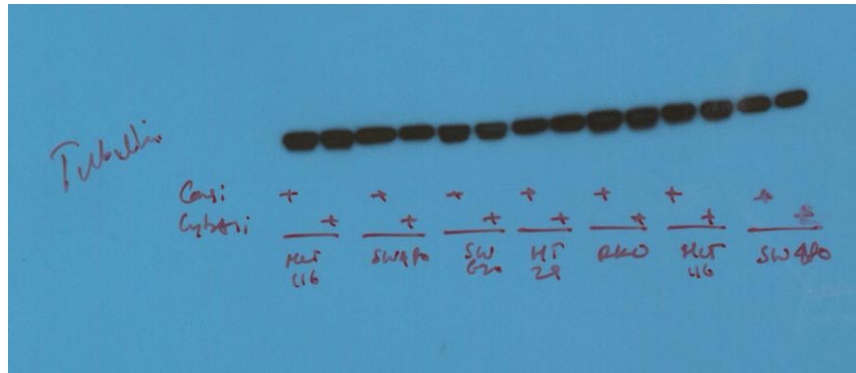

Tubulin

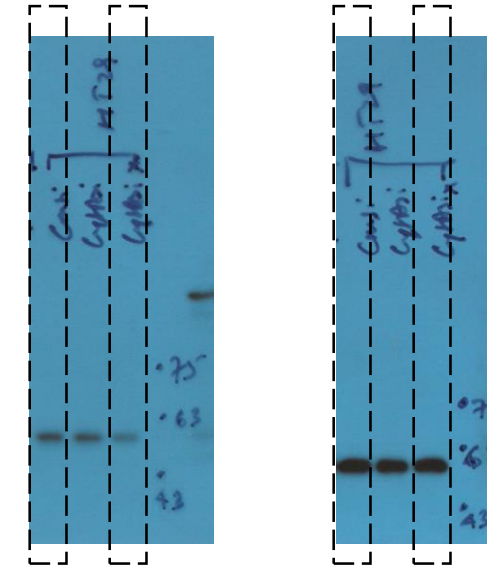

Acetylated tubulin and tubulin blots for HT29 cells

Acetylated tubulin and tubulin blots for  
Different CRC cells

# Original blots for Figure 5 and Supplementary Figure S4

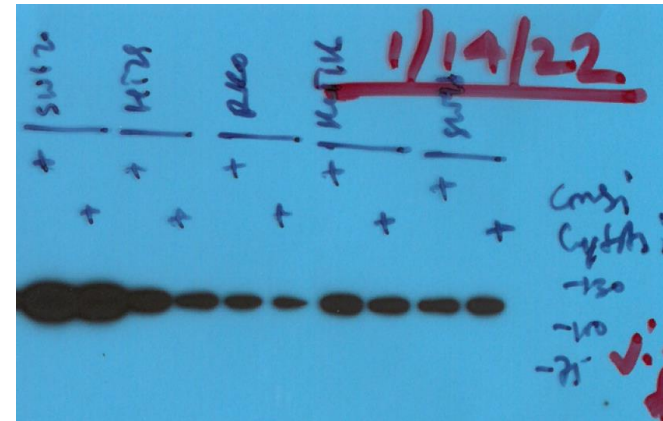

Vinculin  
High exposure

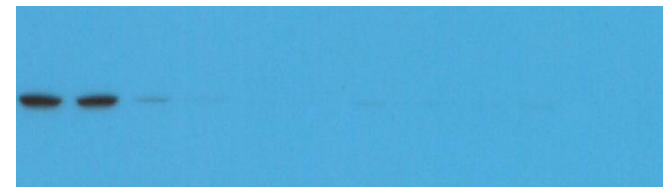

Vinculin  
Low exposure

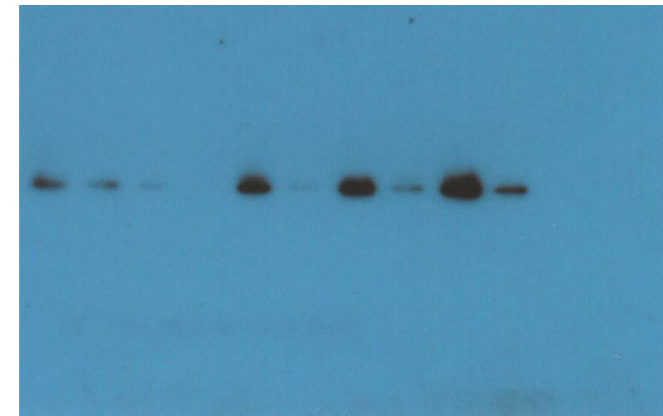

CytospinA  
Low exposure

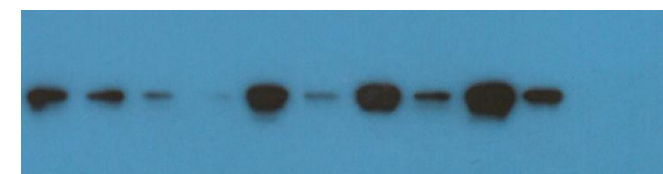

CytospinA  
high exposure
